# Supplementary material for: Six metal–organic architectures from a 5-methoxyisophthalate linker: assembly, structural variety and catalytic features
Source: Royal Society of Chemistry journal article supplement (doi:10.1039/d3ra04111e), 2023-01-01
Supplement: d3ra04111e1.pdf [file d3ra04111e1.pdf]

## Electronic Supplementary Information (ESI)

### **Six metal-organic architectures from 5-methoxyisophthalate linker: assembly, structural variety and catalytic features**

Xiao-Xiang Fan, Hong-Yu Wang, Bo Zhang, Xiu-Qi Kang, Jin-Zhong Gu,\* and Ji-Jun Xue\*

*State Key Laboratory of Applied Organic Chemistry, Key Laboratory of Nonferrous Metal Chemistry and Resources Utilization of Gansu Province, College of Chemistry and Chemical Engineering, Lanzhou University, Lanzhou 730000, People's Republic of China. E-mail: gujzh@lzu.edu.cn*

Electronic Supplementary Information (ESI) contains: analytical data and synthesis for **1–6**, FTIR spectra (Fig. S1), PXRD patterns (Fig. S2), temperature dependence of  $\chi_{\text{M}}T$  vs. T for compounds **1–5** (Fig. S3), additional catalysis data (Figs. S4–S7), structural parameters (Tables S1 and S2), the magnetic moments of compounds **1–5** (Table S3), and comparison of catalytic activity (Table S4). CCDC-2269625–2269630.

## Synthesis and analytical data for 1–6

**Synthesis of  $[\text{Cu}_2(\mu\text{-mia})_2(\text{phen})_2(\text{H}_2\text{O})_2]\cdot 2\text{H}_2\text{O}$  (1).** A mixture of  $\text{CuCl}_2\cdot 2\text{H}_2\text{O}$  (34.1 mg, 0.2 mmol),  $\text{H}_2\text{mia}$  (38.4 mg, 0.2 mmol), phen (40.0 mg, 0.2 mmol), NaOH (16.0 mg, 0.4 mmol), and  $\text{H}_2\text{O}$  (10 mL) was stirred at room temperature for 15 min, then sealed in a 25 mL Teflon-lined stainless steel vessel, and heated at 160 °C for 3 days, followed by cooling to room temperature at a rate of 10 °C/h. Green needle-shaped crystals were isolated manually, washed with distilled water, and dried to furnish compound 1. Yield: 52% (based on  $\text{H}_2\text{mia}$ ). Calcd for  $\text{C}_{42}\text{H}_{36}\text{Cu}_2\text{N}_4\text{O}_{14}$ : C 53.22, H 3.83, N 5.91%. Found: C 52.97, H 3.84, N 5.95%. IR (KBr,  $\text{cm}^{-1}$ ): 3414 w, 3060 w, 1704 w, 1627 m, 1583 s, 1519 m, 1426 s, 1382 s, 1221 w, 1145 w, 1044 w, 907 w, 855 w, 775 w, 730 m, 674 w, 642 w.

**Synthesis of  $[\text{Mn}(\mu_3\text{-mia})(\text{phen})]_n$  (2).** A mixture of  $\text{MnCl}_2\cdot 4\text{H}_2\text{O}$  (40.0 mg, 0.2 mmol),  $\text{H}_2\text{mia}$  (38.4 mg, 0.2 mmol), phen (40.0 mg, 0.2 mmol), NaOH (16.0 mg, 0.4 mmol), and  $\text{H}_2\text{O}$  (10 mL) was stirred at room temperature for 15 min, then sealed in a 25 mL Teflon-lined stainless steel vessel, and heated at 160 °C for 3 days, followed by cooling to room temperature at a rate of 10 °C·h<sup>-1</sup>. Yellow block-shaped crystals were isolated manually, washed with distilled water and dried to give compound 2 (yield 53% based on  $\text{H}_2\text{mia}$ ). Anal. Calcd for  $\text{C}_{42}\text{H}_{28}\text{Mn}_2\text{N}_4\text{O}_{10}$ : C, 58.75; H, 3.29; N, 6.53. Found: C, 58.97; H, 3.31; N, 6.55%. IR (KBr,  $\text{cm}^{-1}$ ): 1613 w, 1584 s, 1547 s, 1514 w, 1452 w, 1402 m, 1381 s, 1320 w, 1226 w, 1187 w, 1125 w, 976 w, 923 w, 893 w, 844 w, 782 w, 724 m, 641 w.

**Synthesis of  $[\text{Co}(\mu_2\text{-mia})(2,2'\text{-bipy})(\text{H}_2\text{O})]_n\cdot n\text{H}_2\text{O}$  (3).** A mixture of  $\text{CoCl}_2\cdot 6\text{H}_2\text{O}$  (47.6 mg, 0.2 mmol),  $\text{H}_2\text{mia}$  (38.4 mg, 0.2 mmol), 2,2'-bipy (31.2 mg, 0.2 mmol), NaOH (16.0 mg, 0.4 mmol), and  $\text{H}_2\text{O}$  (10 mL) was stirred at room temperature for 15 min, then sealed in a 25 mL Teflon-lined stainless steel vessel, and heated at 160 °C for 3 days, followed by cooling to room temperature at a rate of 10 °C·h<sup>-1</sup>. Pink block-shaped crystals were isolated manually, washed with distilled water and dried (yield 47% based on  $\text{H}_2\text{mia}$ ) to give compound 3. Anal. Calcd for  $\text{C}_{19}\text{H}_{18}\text{CoN}_2\text{O}_7$ : C, 51.25; H, 4.07; N, 6.29. Found: C, 51.13; H, 4.05; N, 6.33%. IR (KBr,  $\text{cm}^{-1}$ ): 3268 w, 3120 w, 3004 w, 1609 w, 1572 s, 1547 s, 1473 w, 1457 w, 1440 s, 1398 s, 1328 w, 1266 w, 1191 w, 1130 w, 1105 w, 1055 w, 1026 w, 976 w,

931 w, 893 w, 798 w, 778 m, 732 w, 653 w.

**Synthesis of  $[\text{Co}(\mu_3\text{-mia})(4,4'\text{-bipy})]_n \cdot n\text{H}_2\text{O}$  (4).** A mixture of  $\text{CoCl}_2 \cdot 6\text{H}_2\text{O}$  (47.6 mg, 0.2 mmol),  $\text{H}_2\text{mia}$  (38.4 mg, 0.2 mmol), 4,4'-bipy (31.2 mg, 0.20 mmol), NaOH (16.0 mg, 0.40 mmol), and  $\text{H}_2\text{O}$  (10 mL) was stirred at room temperature for 15 min, then sealed in a 25 mL Teflon-lined stainless steel vessel, and heated at 160 °C for 3 days, followed by cooling to room temperature at a rate of 10 °C·h<sup>-1</sup>. Pink block-shaped crystals were isolated manually, washed with distilled water and dried to give compound **4** (yield 45% based on  $\text{H}_2\text{mia}$ ). Anal. Calcd for  $\text{C}_{19}\text{H}_{16}\text{CoN}_2\text{O}_6$ : C, 53.41; H, 3.77; N, 6.56. Found: C, 53.68; H, 3.80; N, 6.54%. IR (KBr, cm<sup>-1</sup>): 3074 w, 3049 w, 2941 w, 1605 w, 1589 m, 1551 w, 1452 w, 1398 s, 1324 w, 1266 w, 1220 w, 1130 w, 1055 w, 1005 w, 930 w, 886 w, 823 w, 782 w, 728 m, 678 w, 633 w.

**Synthesis of  $[\text{Co}(\mu_3\text{-mia})(\text{py})_2]_n$  (5).** A mixture of  $\text{CoCl}_2 \cdot 6\text{H}_2\text{O}$  (47.6 mg, 0.2 mmol),  $\text{H}_2\text{mia}$  (38.4 mg, 0.2 mmol), py (0.5 mL, 6.05 mmol), and  $\text{H}_2\text{O}$  (10 mL) was stirred at room temperature for 15 min, then sealed in a 25 mL Teflon-lined stainless steel vessel, and heated at 160 °C for 3 days, followed by cooling to room temperature at a rate of 10 °C·h<sup>-1</sup>. Pink block-shaped crystals were isolated manually, washed with distilled water and dried to give compound **5** (yield 52% based on  $\text{H}_2\text{mia}$ ). Anal. Calcd for  $\text{C}_{19}\text{H}_{16}\text{CoN}_2\text{O}_5$ : C, 55.49; H, 3.92; N, 6.81. Found: C, 55.74; H, 3.94; N, 6.77%. IR (KBr, cm<sup>-1</sup>): 1620 w, 1585 s, 1549 s, 1449 s, 1397 s, 1325 w, 1265 w, 1217 w, 1129 w, 1109 w, 1057 w, 1009 w, 945 w, 926 w, 889 w, 786 m, 757 w, 725 m, 698 m, 626 w.

**Synthesis of  $[\text{Cd}(\mu\text{-mia})(\text{py})(\text{H}_2\text{O})_2]_n \cdot n\text{H}_2\text{O}$  (6).** A mixture of  $\text{CdCl}_2 \cdot \text{H}_2\text{O}$  (40.2 mg, 0.2 mmol),  $\text{H}_2\text{mia}$  (38.4 mg, 0.2 mmol), py (0.5 mL, 6.05 mmol), and  $\text{H}_2\text{O}$  (10 mL) was stirred at room temperature for 15 min, then sealed in a 25 mL Teflon-lined stainless steel vessel, and heated at 160 °C for 3 days, followed by cooling to room temperature at a rate of 10 °C·h<sup>-1</sup>. Yellow block-shaped crystals were isolated manually, washed with distilled water and dried to give compound **6** (yield 51% based on  $\text{H}_2\text{mia}$ ). Anal. Calcd for  $\text{C}_{14}\text{H}_{17}\text{CdNO}_8$ : C, 38.24; H, 3.90; N, 3.19. Found: C, 38.44; H, 3.88; N, 3.17%. IR (KBr, cm<sup>-1</sup>): 3547 w, 3352 m, 2944 w, 1608 w, 1565 s, 1449 m, 1381 s, 1317 w, 1261 w, 1221 w, 1157 w, 1129 w, 1049 w, 1009 w, 931 w, 889 w, 810 w, 781 w, 738 m, 698 w, 629 w.

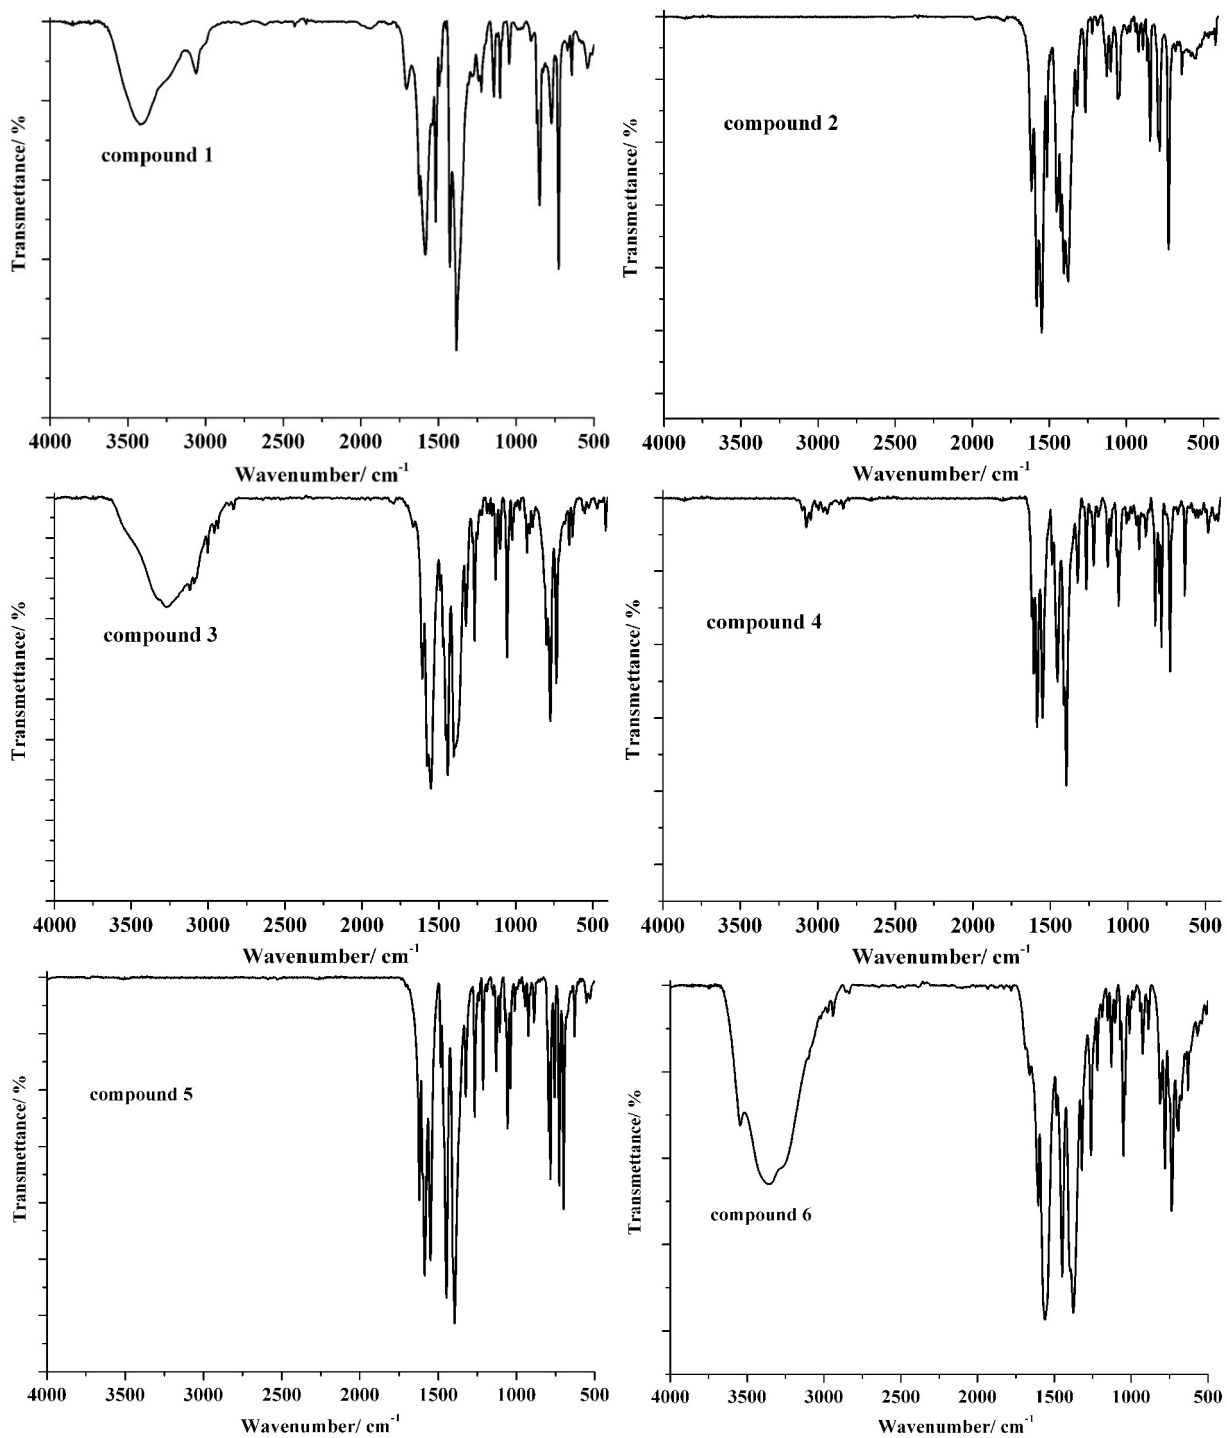

**Fig. S1.** FTIR spectra of compounds 1–6.

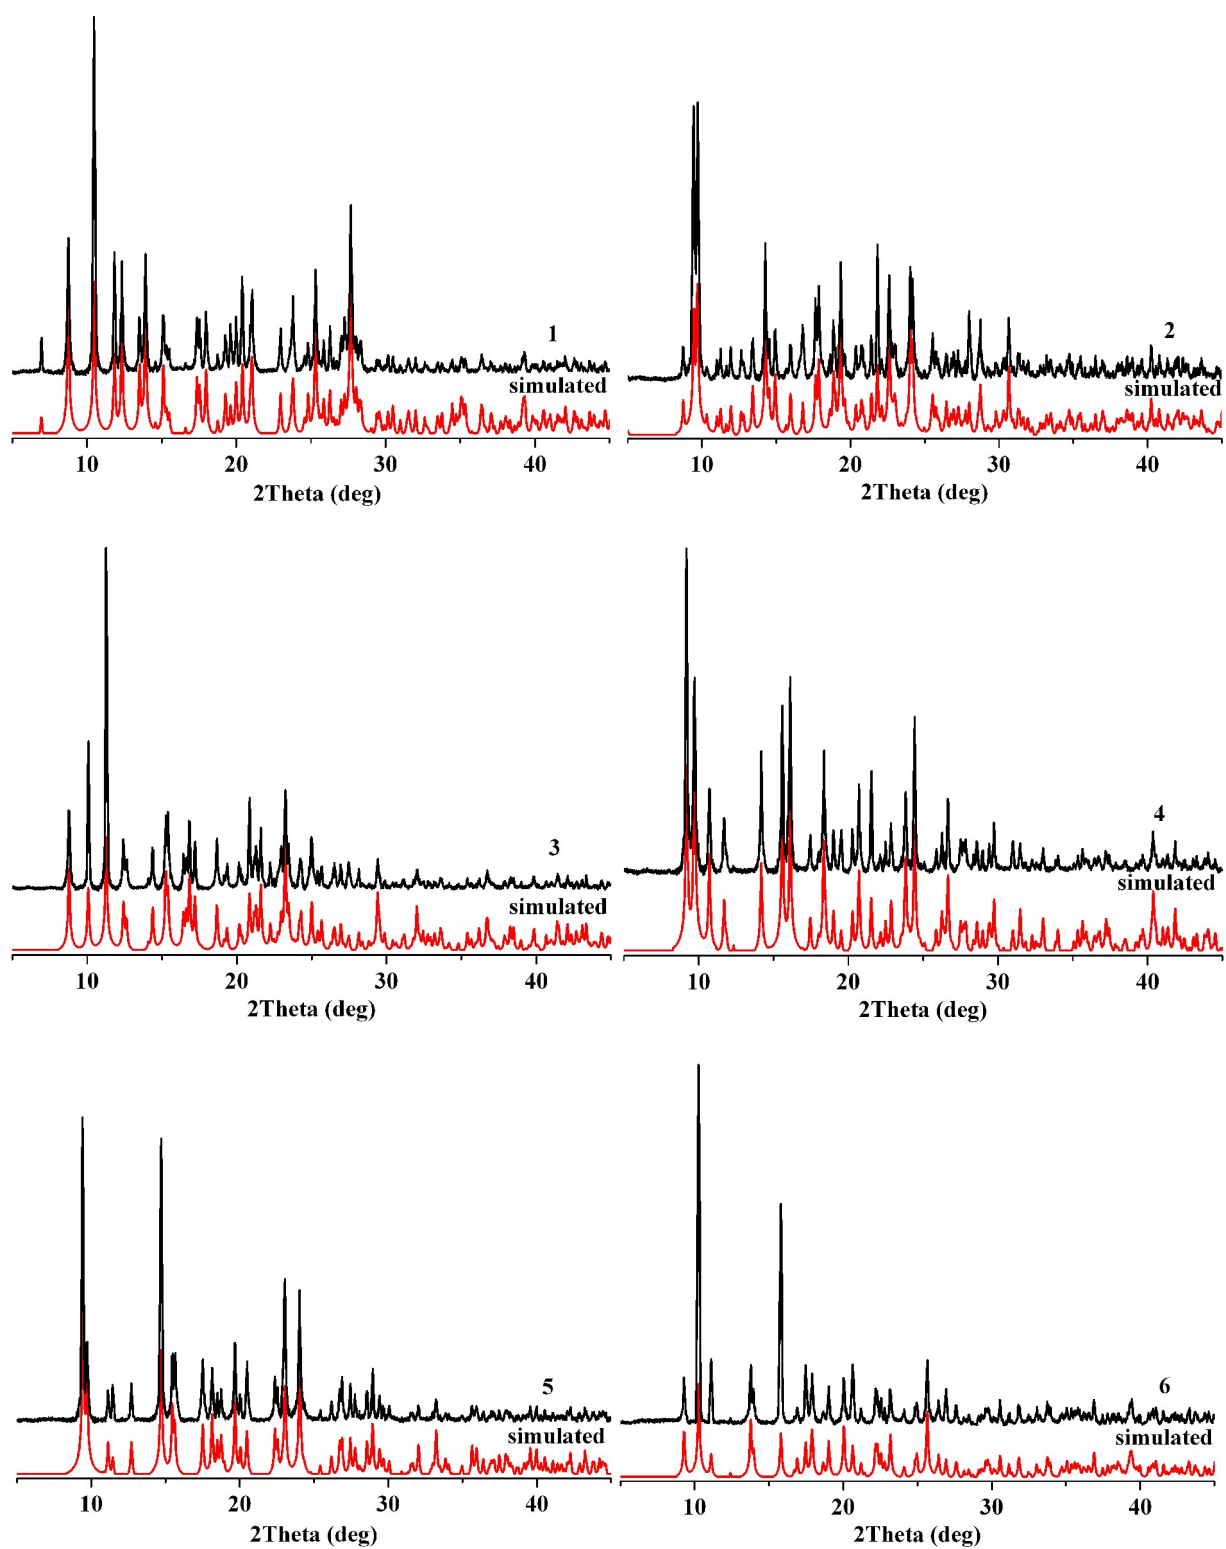

**Fig. S2.** PXRd patterns of compounds 1–6 at room temperature. Black patterns correspond to the experimental data obtained using the as-synthesized bulk samples. Red patterns were simulated from the single crystal X-ray data.

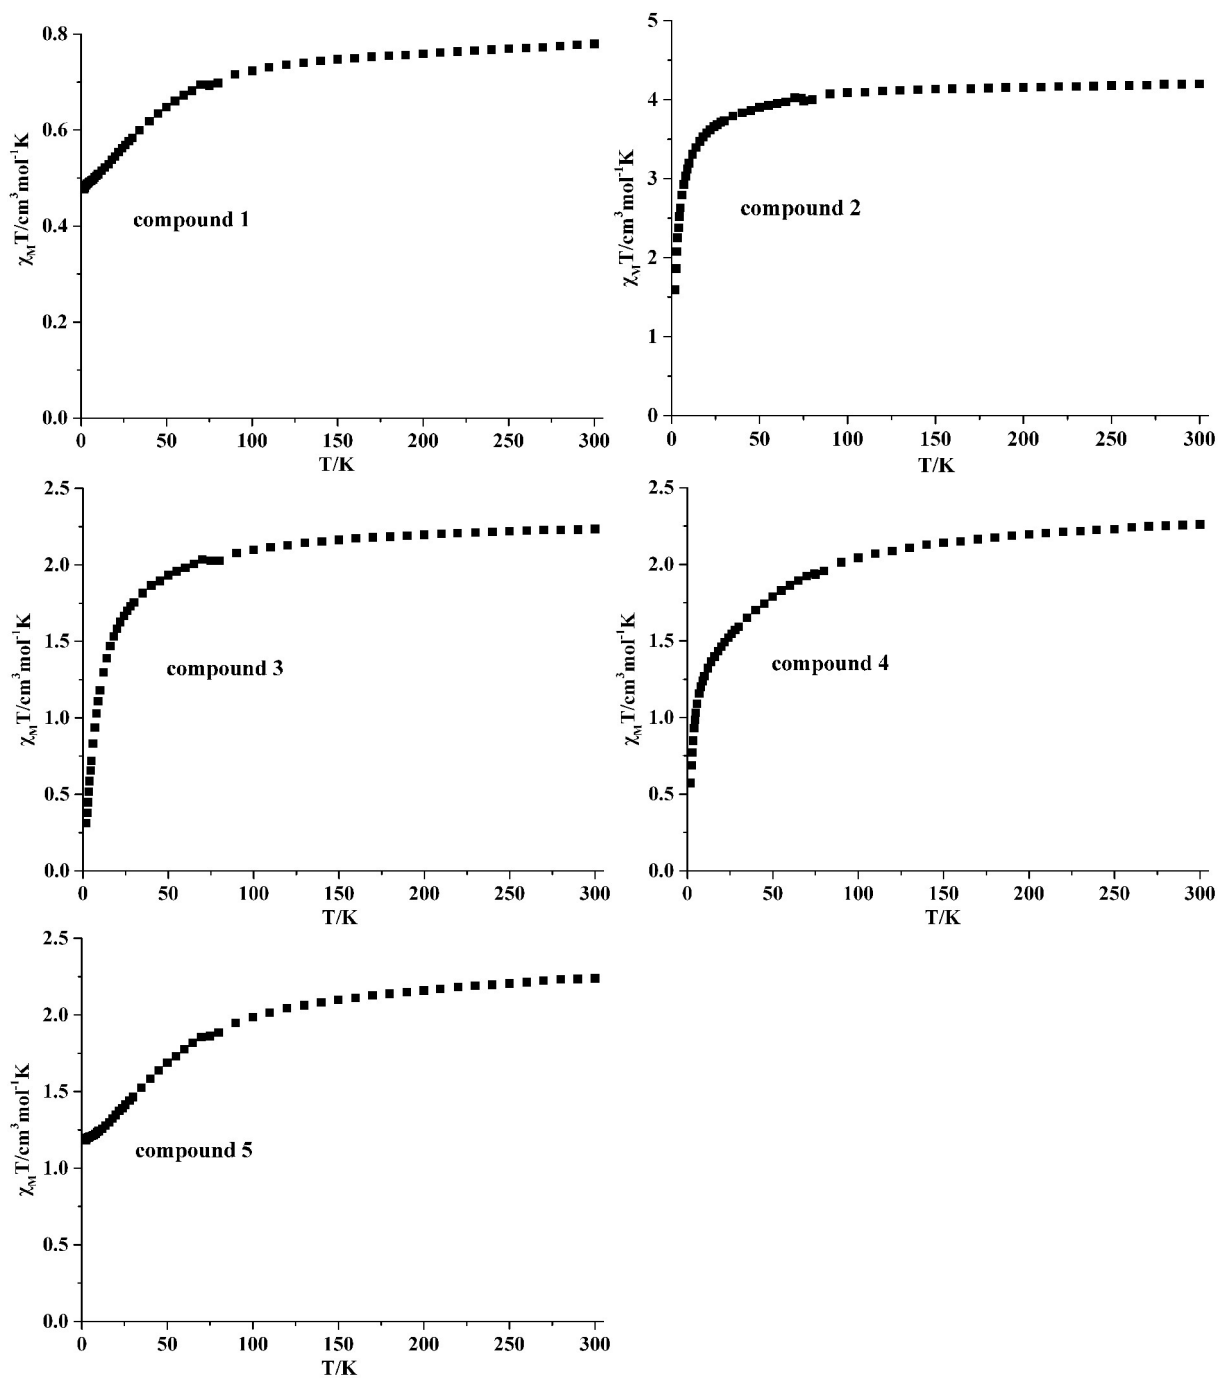

**Fig. S3.** Temperature dependence of  $\chi_M T$  vs.  $T$  for compounds 1–5.

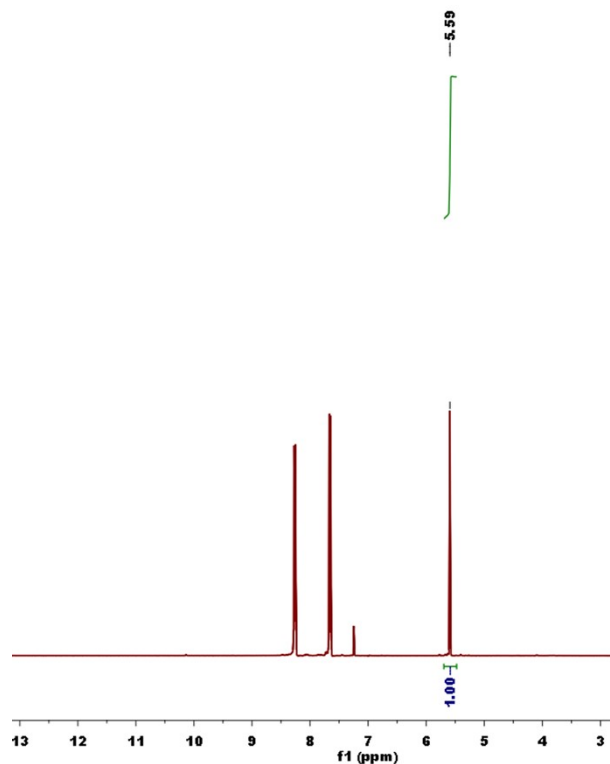

**Fig. S4.** Example of the integration in the  $^1\text{H}$  NMR spectrum of the reaction mixture for the determination of the cyanosilylation product (conditions of Table 3, Entry 6).

**Examples of product yield calculation in the cyanosilylation reaction.** The C(=O)  $H$  signal of 4-nitrobenzaldehyde (substrate) appears at  $\delta$ 10.15 ppm, while 2-(4-nitrophenyl)-2-((trimethylsilyl)oxy)acetonitrile (product) shows a characteristic signal at  $\delta$ 5.59 ppm.

Total integration of both signals: unreacted 4-nitrobenzaldehyde + 2-(4-nitrophenyl)-2-((trimethylsilyl)oxy)acetonitrile = 0 + 1 = 1.

Percentage of the unreacted substrate:  $0/1 = 0$

Conversion of 4-nitrobenzaldehyde = yield of 2-(4-nitrophenyl)-2-((trimethylsilyl)oxy)acetonitrile =  $100 - 0 = 100\%$ .

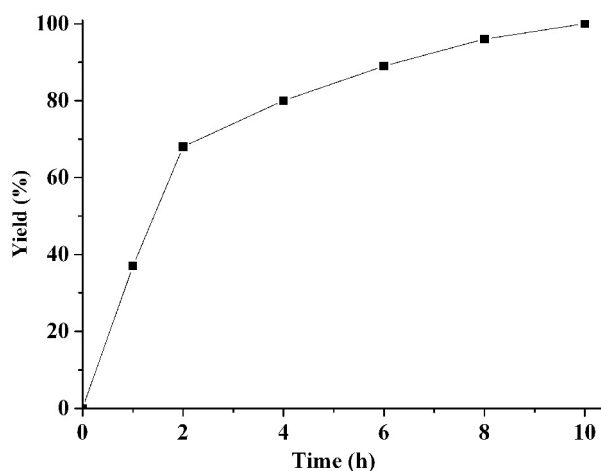

**Fig. S5.** Accumulation of 2-(4-nitrophenyl)-2-[(trimethylsilyl)oxy]acetonitrile vs. time in the cyanosilylation of 4-nitrobenzaldehyde with TMSCN catalysed by **1**. Reaction conditions are those of Table 3, entries 1–6.

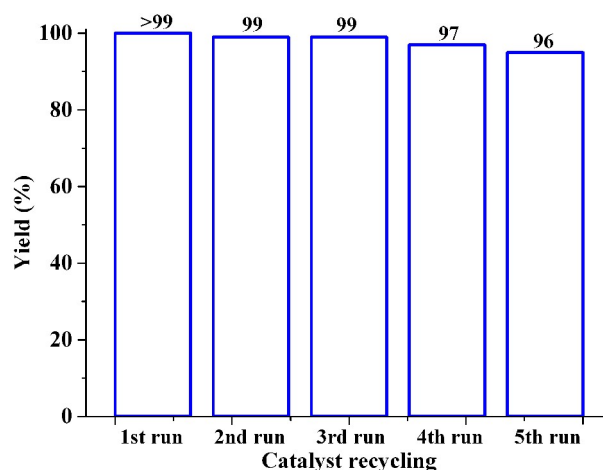

**Fig. S6.** Catalyst recycling experiments in the cyanosilylation of 4-nitrobenzaldehyde with TMSCN catalysed by **1**. Reaction conditions are those of Table 3, entry 6.

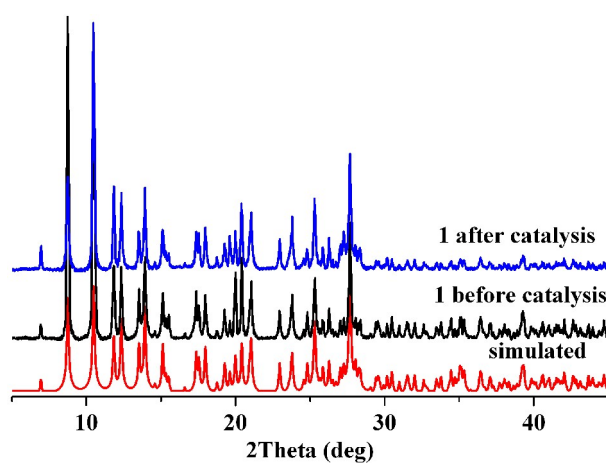

**Fig. S7.** PXRD patterns for **1**: simulated (red), before (black) and after (blue) catalytic experiments.

**Table S1.** Selected bond lengths [ $\text{\AA}$ ] and angles [ $^\circ$ ] for compounds **1**–**6**.<sup>a</sup>

| <b>1</b>          |           |                   |            |                   |            |
|-------------------|-----------|-------------------|------------|-------------------|------------|
| Cu(1)-O(1)        | 1.953(2)  | Cu(1)-O(4)#1      | 2.250(2)   | Cu(1)-O(6)        | 1.966(2)   |
| Cu(1)-N(1)        | 2.001(3)  | Cu(1)-N(2)        | 2.011(3)   |                   |            |
| O(1)-Cu(1)-O(6)   | 94.73(9)  | O(1)-Cu(1)-N(1)   | 169.99(11) | N(1)-Cu(1)-O(6)   | 91.95(10)  |
| O(1)-Cu(1)-N(2)   | 89.45(10) | N(2)-Cu(1)-O(6)   | 163.28(10) | N(1)-Cu(1)-N(2)   | 82.08(11)  |
| O(1)-Cu(1)-O(4)#1 | 95.03(10) | O(6)-Cu(1)-O(4)#1 | 96.12(9)   | N(1)-Cu(1)-O(4)#1 | 91.65(10)  |
| N(2)-Cu(1)-O(4)#1 | 99.64(10) |                   |            |                   |            |
| <b>2</b>          |           |                   |            |                   |            |
| Mn(1)-O(1)        | 2.132(5)  | Mn(1)-O(6)        | 2.291(5)   | Mn(1)-O(7)        | 2.226(5)   |
| Mn(1)-O(9)#1      | 2.110(5)  | Mn(1)-N(1)        | 2.280(6)   | Mn(1)-N(2)        | 2.278(7)   |
| Mn(2)-O(2)#2      | 2.111(5)  | Mn(2)-O(3)        | 2.230(5)   | Mn(2)-O(4)        | 2.308(6)   |
| Mn(2)-O(8)        | 2.105(5)  | Mn(2)-N(3)        | 2.304(7)   | Mn(2)-N(4)        | 2.263(7)   |
| O(1)-Mn(1)-O(9)#1 | 96.3(2)   | O(7)-Mn(1)-O(9)#1 | 109.1(2)   | O(1)-Mn(1)-O(7)   | 90.2(2)    |
| N(2)-Mn(1)-O(9)#1 | 155.6(2)  | O(1)-Mn(1)-N(2)   | 80.9(2)    | O(7)-Mn(1)-N(2)   | 95.1(2)    |
| N(1)-Mn(1)-O(9)#1 | 89.5(2)   | O(1)-Mn(1)-N(1)   | 124.0(2)   | O(7)-Mn(1)-N(2)   | 139.6(2)   |
| N(2)-Mn(1)-N(1)   | 72.7(2)   | O(6)-Mn(1)-O(9)#1 | 97.1(2)    | O(6)-Mn(1)-O(1)   | 147.21(19) |
| O(6)-Mn(1)-O(7)   | 57.11(18) | O(6)-Mn(1)-N(2)   | 98.0(2)    | O(6)-Mn(1)-N(1)   | 85.91(19)  |
| O(8)-Mn(2)-O(2)#2 | 98.0(2)   | O(8)-Mn(2)-O(3)   | 91.5(2)    | O(3)-Mn(2)-O(2)#2 | 102.7(2)   |



|                     |            |                     |            |                     |            |
|---------------------|------------|---------------------|------------|---------------------|------------|
| O(8)-Mn(2)-N(4)     | 82.9(2)    | N(4)-Mn(2)-O(2)#2   | 162.1(2)   | N(4)-Mn(2)-O(3)     | 95.1(2)    |
| O(8)-Mn(2)-N(3)     | 128.0(2)   | N(3)-Mn(2)-O(2)#2   | 93.2(2)    | O(3)-Mn(2)-N(3)     | 134.9(2)   |
| N(4)-Mn(2)-N(3)     | 72.7(3)    | O(8)-Mn(2)-O(4)     | 147.41(19) | O(2)-Mn(2)-O(4)     | 97.8(2)    |
| O(3)-Mn(2)-O(4)     | 57.17(19)  | N(4)-Mn(2)-O(4)     | 90.5(2)    | N(3)-Mn(2)-O(4)     | 79.2(2)    |
| <b>3</b>            |            |                     |            |                     |            |
| Co(1)-O(1)          | 2.335(2)   | Co(1)-O(2)          | 2.162(2)   | Co(1)-O(3)#1        | 2.0205(19) |
| Co(1)-O(6)          | 2.1028(19) | Co(1)-N(1)          | 2.127(2)   | Co(1)-N(2)          | 2.102(2)   |
| O(3)#1-Co(1)-N(2)   | 126.57(9)  | O(3)#1-Co(1)-O(6)   | 97.18(8)   | O(6)-Co(1)-N(2)     | 96.64(8)   |
| O(3)#1-Co(1)-N(1)   | 89.57(9)   | N(2)-Co(1)-N(1)     | 76.38(9)   | O(6)-Co(1)-N(1)     | 172.36(8)  |
| O(3)#1-Co(1)-O(2)   | 86.09(8)   | O(2)-Co(1)-N(2)     | 144.26(9)  | O(6)-Co(1)-O(2)     | 92.45(8)   |
| O(2)-Co(1)-N(1)     | 91.58(9)   | O(3)#1-Co(1)-O(1)   | 142.95(8)  | O(1)-Co(1)-N(2)     | 88.33(8)   |
| O(6)-Co(1)-O(1)     | 89.58(8)   | O(1)-Co(1)-N(1)     | 87.16(9)   | O(1)-Co(1)-O(2)     | 57.15(8)   |
| <b>4</b>            |            |                     |            |                     |            |
| Co(1)-O(1)#1        | 2.029(3)   | Co(1)-O(2)          | 2.041(3)   | Co(1)-O(3)#2        | 2.235(3)   |
| Co(1)-O(4)#2        | 2.136(3)   | Co(1)-N(1)          | 2.132(3)   | Co(1)-N(2)#3        | 2.150(3)   |
| O(1)#1-Co(1)-O(2)   | 118.93(12) | O(1)#1-Co(1)-N(1)   | 91.38(12)  | O(2)-Co(1)-N(1)     | 91.01(11)  |
| O(1)#1-Co(1)-O(4)#2 | 90.83(11)  | O(2)-Co(1)-O(4)#2   | 150.11(12) | O(4)#2-Co(1)-N(1)   | 91.02(13)  |
| O(1)#1-Co(1)-N(2)#3 | 88.09(12)  | O(2)-Co(1)-N(2)#3   | 86.51(12)  | N(1)-Co(1)-N(2)#3   | 176.83(12) |
| O(4)#2-Co(1)-N(2)#3 | 92.11(13)  | O(3)#2-Co(1)-O(1)#1 | 150.04(11) | O(3)#2-Co(1)-O(2)   | 90.47(11)  |
| O(3)#2-Co(1)-N(1)   | 93.89(12)  | O(3)#2-Co(1)-O(4)#2 | 59.64(11)  | O(3)#2-Co(1)-N(2)#3 | 88.12(12)  |
| <b>5</b>            |            |                     |            |                     |            |
| Co(1)-O(1)          | 2.1303(19) | Co(1)-O(2)          | 2.246(2)   | Co(1)-O(3)#1        | 2.021(2)   |
| Co(1)-O(4)#2        | 2.0450(19) | Co(1)-N(1)          | 2.170(3)   | Co(1)-N(2)          | 2.158(3)   |
| O(3)#1-Co(1)-O(4)#2 | 119.76(8)  | O(3)#1-Co(1)-O(1)   | 91.62(8)   | O(1)-Co(1)-O(4)#2   | 148.61(8)  |
| O(3)#1-Co(1)-N(2)   | 90.47(10)  | N(2)-Co(1)-O(4)#2   | 90.17(9)   | O(1)-Co(1)-N(2)     | 90.46(9)   |
| O(3)#1-Co(1)-N(1)   | 89.10(10)  | O(4)#2-Co(1)-N(1)   | 87.73(9)   | N(1)-Co(1)-O(1)     | 92.23(9)   |
| N(1)-Co(1)-N(2)     | 177.29(9)  | O(3)#1-Co(1)-O(2)   | 151.20(8)  | O(4)#2-Co(1)-O(2)   | 88.90(7)   |
| O(2)-Co(1)-O(1)     | 59.72(7)   | O(2)-Co(1)-N(2)     | 92.39(9)   | O(2)-Co(1)-N(1)     | 89.27(9)   |
| <b>6</b>            |            |                     |            |                     |            |
| Cd(1)-O(1)          | 2.404(3)   | Cd(1)-O(2)          | 2.413(3)   | Cd(1)-O(4)#1        | 2.256(3)   |
| Cd(1)-O(6)          | 2.288(3)   | Cd(1)-O(7)          | 2.360(3)   | Cd(1)-N(1)          | 2.295(3)   |
| O(4)#1-Cd(1)-O(6)   | 89.24(11)  | O(4)#1-Cd(1)-N(1)   | 136.12(11) | O(6)-Cd(1)-N(1)     | 90.73(12)  |
| O(8)#1-Cd(1)-N(1)   | 86.60(11)  | O(6)-Cd(1)-O(7)     | 175.59(10) | N(1)-Cd(1)-O(7)     | 91.25(11)  |
| O(4)#1-Cd(1)-O(1)   | 83.57(10)  | O(6)-Cd(1)-O(1)     | 94.70(12)  | N(1)-Cd(1)-O(1)     | 140.07(11) |
| O(7)-Cd(1)-O(1)     | 86.30(11)  | O(4)#1-Cd(1)-O(2)   | 137.44(10) | O(2)-Cd(1)-O(6)     | 94.03(12)  |
| O(2)-Cd(1)-N(1)     | 86.32(12)  | O(7)-Cd(1)-O(2)     | 90.03(11)  | O(1)-Cd(2)-O(2)     | 53.87(10)  |

<sup>a</sup> Symmetry transformations used to generate equivalent atoms: #1  $-x+2, -y+2, -z+2$  for **1**; #1  $x, -y+2, z-1/2$ ; #2,  $x, -y+2, z+1/2$  for **2**; #1  $-x, y-1/2, -z+3/2$  for **3**; #1  $-x+1, -y+1, -z+1$ ; #2  $x, y+1, z$ ; #3  $x-1, y, z+1$  for **4**; #1  $-x+2, -y+1, -z+1$ ; #2  $x+1/2, y+1/2, z$  for **5**; #1  $x, y, z-1$  for **6**.

**Table S2.** Hydrogen bonds in crystal packing [ $\text{\AA}$ ,  $^\circ$ ] of **1**, **3** and **6**.

| Complexes | D-H...A           | $d(\text{D-H})$ | $d(\text{H...A})$ | $d(\text{D...A})$ | $\angle\text{DHA}$ | Symmetry code      |
|-----------|-------------------|-----------------|-------------------|-------------------|--------------------|--------------------|
| <b>1</b>  | O(6)-H(1W)···O(3) | 0.820           | 1.874             | 2.632             | 153.18             | -x+1, -y+2, -z+2   |
|           | O(6)-H(2W)···O(2) | 0.850           | 1.747             | 2.597             | 179.60             |                    |
|           | O(7)-H(3W)···O(3) | 0.850           | 2.118             | 2.968             | 179.44             | -x+1, -y+1, -z+2   |
|           | O(7)-H(4W)···O(4) | 0.850           | 1.996             | 2.846             | 179.03             | x-1, y-1, z-1      |
| <b>3</b>  | O(6)-H(1W)···O(4) | 0.869           | 1.931             | 2.743             | 154.74             | x, -y+1/2, z+1/2   |
|           | O(7)-H(3W)···O(6) | 0.844           | 1.902             | 2.684             | 153.58             | x+1, y, z-1        |
|           | O(7)-H(4W)···O(2) | 0.829           | 1.892             | 2.721             | 178.85             | x+1, -y+1/2, z-1/2 |
| <b>6</b>  | O(6)-H(1W)···O(8) | 0.844           | 1.877             | 2.715             | 171.84             | x, y+1, z-1        |
|           | O(6)-H(2W)···O(2) | 0.841           | 1.912             | 2.750             | 173.76             | -x+1, -y+2, -z     |
|           | O(7)-H(3W)···O(1) | 0.853           | 2.006             | 2.778             | 152.00             | -x+1, -y+1, -z     |
|           | O(7)-H(4W)···O(4) | 0.852           | 2.006             | 2.797             | 154.05             | -x+1, -y+1, -z+1   |
|           | O(8)-H(5W)···O(3) | 0.830           | 1.942             | 2.760             | 168.66             | -x+1, -y+1, -z+1   |
|           | O(8)-H(6W)···O(5) | 0.850           | 2.098             | 2.948             | 179.31             | -x, -y+1, -z+1     |

**Table S3.** The magnetic moments of compounds **1–5**.

| Entry | Compound | Magnetic unit   | $\chi_M T$ at 300 K ( $\text{cm}^3 \cdot \text{mol}^{-1} \cdot \text{K}$ ) | $\mu$ (B.M.) <sup>a</sup> | Assigned to the metal centers <sup>b</sup> |
|-------|----------|-----------------|----------------------------------------------------------------------------|---------------------------|--------------------------------------------|
| 1     | <b>1</b> | Cu <sub>2</sub> | 0.78                                                                       | Exptl, 1.77; Calcd, 1.73  | Two Cu(II), $S = 1/2$                      |
| 2     | <b>2</b> | Mn <sub>2</sub> | 4.40                                                                       | Exptl, 5.94; Calcd, 5.92  | One Mn(II), $S = 5/2$                      |
| 3     | <b>3</b> | Co chain        | 2.23                                                                       | Exptl, 4.23; Calcd, 3.87  | One Co(II), $S = 3/2$                      |
| 4     | <b>4</b> | Co <sub>2</sub> | 2.26                                                                       | Exptl, 4.25; Calcd, 3.87  | One Co(II), $S = 3/2$                      |
| 5     | <b>5</b> | Co <sub>2</sub> | 2.24                                                                       | Exptl, 4.24; Calcd, 3.87  | One Co(II), $S = 3/2$                      |

<sup>a</sup> $\mu = 2.83(\chi_M T)^{1/2}$ , where  $\chi_M$  is the molar magnetic susceptibility. <sup>b</sup> $\mu = [n(n+2)]^{1/2}$ , where  $n$  is the number of unpaired electrons.

**Table S4.** Comparison of various catalysts for the cyanosilylation between 4-nitrobenzaldehyde with TMSCN.

| Entry | Catalyst                                                                                                                      | Catalyst (mol%) | Solvent                         | Time (h) | Temp. ( $^\circ\text{C}$ ) | Conversion (%) | Ref.      |
|-------|-------------------------------------------------------------------------------------------------------------------------------|-----------------|---------------------------------|----------|----------------------------|----------------|-----------|
| 1     | [Cu <sub>2</sub> ( $\mu_2$ -mia) <sub>2</sub> (phen) <sub>2</sub> (H <sub>2</sub> O) <sub>2</sub> ] $\cdot$ 2H <sub>2</sub> O | 3               | CH <sub>2</sub> Cl <sub>2</sub> | 10       | 35                         | 100            | This work |
| 2     | {Mn <sub>2</sub> (bdc) <sub>2</sub> (DMF) <sub>2</sub> } <sub>n</sub>                                                         | 2.5             | CH <sub>2</sub> Cl <sub>2</sub> | 19       | 30                         | 100            | 62        |
| 3     | [Cd <sub>3</sub> (tipp)(bpdc) <sub>2</sub> ] $\cdot$ DMA $\cdot$ 9H <sub>2</sub> O                                            | 0.6             | Solvent free                    | 18       | RT                         | 100            | 63        |
| 4     | Zn-ADBA                                                                                                                       | 0.3             | CH <sub>2</sub> Cl <sub>2</sub> | 12       | 25                         | 92.3           | 64        |
| 5     | [Cu <sub>3</sub> (OH) <sub>2</sub> (L) <sub>2</sub> ] <sub>n</sub> $\cdot$ n(H <sub>2</sub> O)                                | 2               | CH <sub>2</sub> Cl <sub>2</sub> | 10       | 25-30                      | 65             | 65        |
| 6     | [Zn(3,3'-TPDC)] $\cdot$ DMF $\cdot$ 2H <sub>2</sub> O                                                                         | 0.8             | toluene                         | 24       | 50                         | 77             | 66        |
| 7     | BINAPDA-Zr-MOF                                                                                                                | 5               | CH <sub>3</sub> CN              | 5        | 0                          | 85             | 67        |
| 8     | Tb-TCA                                                                                                                        | 2               | CH <sub>2</sub> Cl <sub>2</sub> | 4        | RT                         | 47             | 68        |
| 9     | [Sc(pydc)(H <sub>2</sub> O)(NO <sub>3</sub> )]                                                                                | 10              | CH <sub>3</sub> CN              | 24       | RT                         | 85.2           | 69        |
